# Supplementary material
Source: PubMed Central journal article supplement (PMC3318596)
Supplement: supp_32.8.1506_MCB-MCB06271-11-s02.pdf [file supp_32.8.1506_MCB-MCB06271-11-s02.pdf]

Figure S2

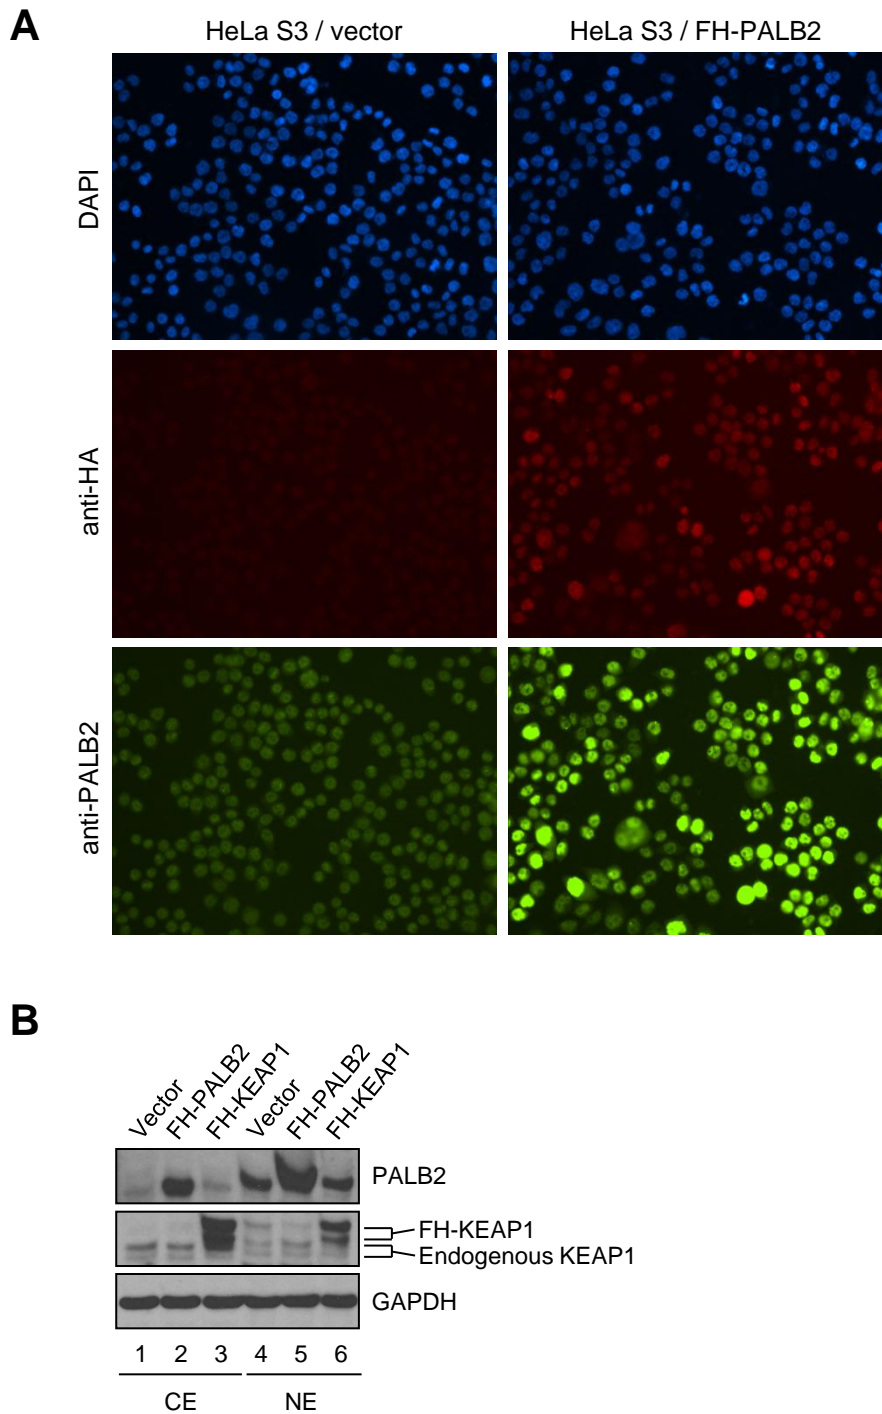

**Figure S2.** (A) HeLa S3 cells stably harboring an empty vector (pOZ-FH-N) or PALB2-expressing construct (pOZ-FH-N-PALB2) were analyzed using immunofluorescence. Anti-HA detects only exogenous PALB2 while the anti-PALB2 detects both endogenous and exogenous PALB2. (B) Effect of PALB2 and KEAP1 overexpression on each other's abundance and subcellular distribution. Stable HeLa S3 cells expressing the vector, FH-PALB2 or FH-KEAP1 were fractionated into cytoplasmic extract (CE) and nuclear extract (NE), and the amounts of PALB2 and KEAP1 were analyzed by Western blotting. Note that large amount of GAPDH exists in the nucleus in these cells.
