# Supplementary material
Source: PubMed Central journal article supplement (PMC3318596)
Supplement: supp_32.8.1506_MCB-MCB06271-11-s03.pdf [file supp_32.8.1506_MCB-MCB06271-11-s03.pdf]

Figure S3

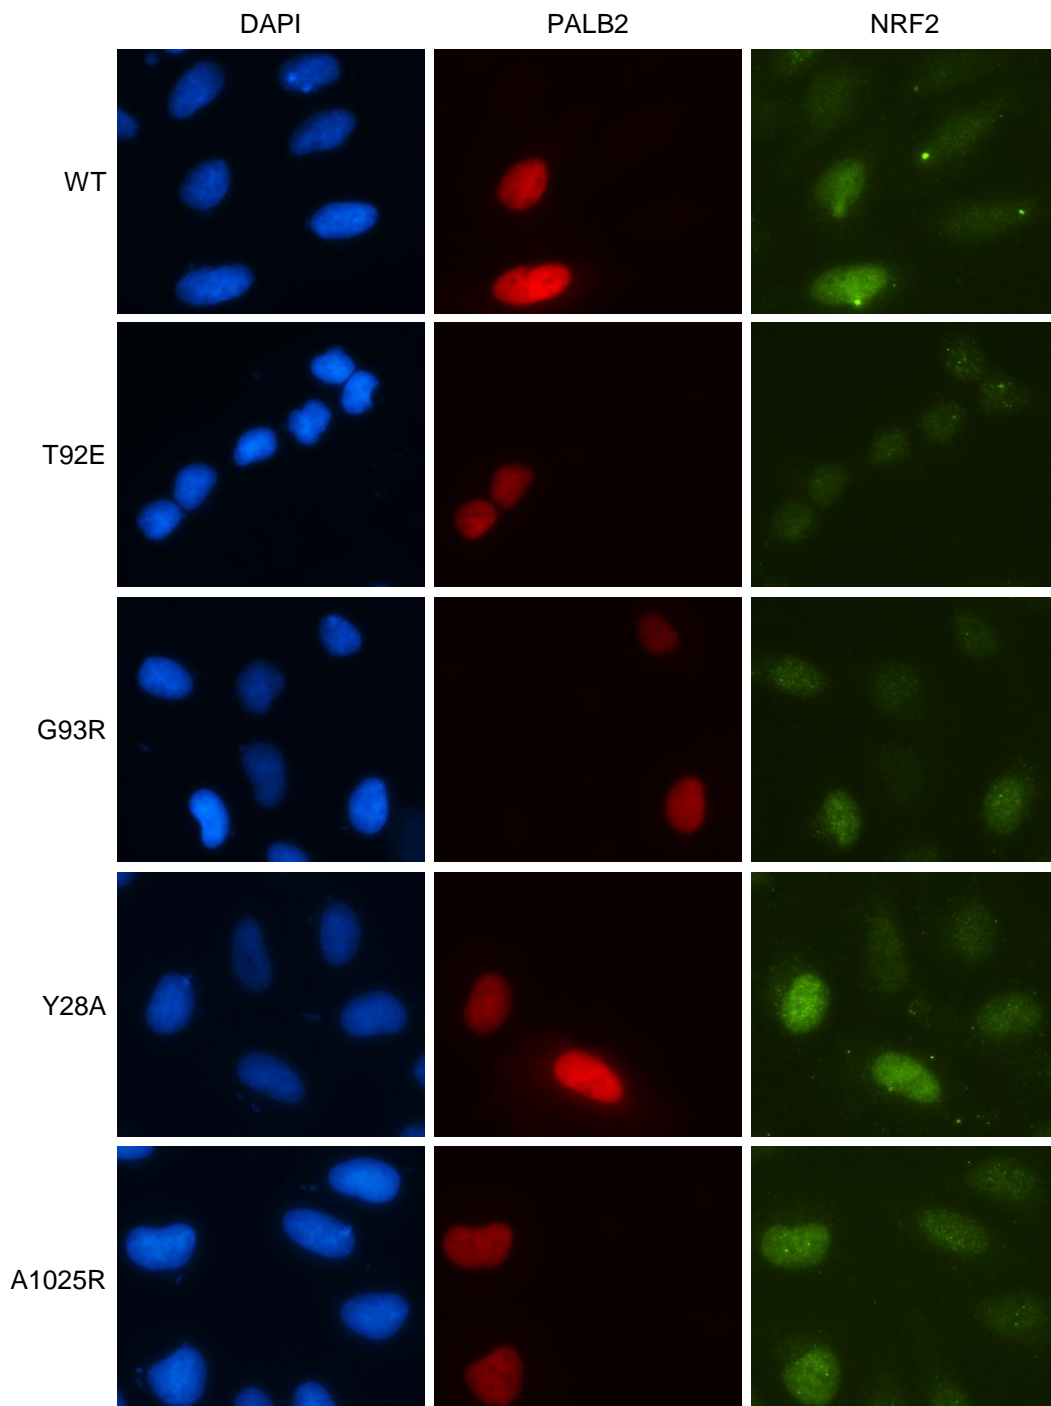

**Figure S3.** Effect of overexpression of wt and mutant PALB2 on NRF2 nuclear accumulation. FLAG-HA double tagged wt and mutant PALB2 expression vectors were transfected into U2OS cells. 48 hr post transfection, overexpressed PALB2 and endogenous NRF2 were analyzed by IF using anti-HA and anti-NRF2 antibodies, respectively.
