# Supplementary material
Source: PubMed Central journal article supplement (PMC3318596)
Supplement: supp_32.8.1506_MCB-MCB06271-11-s05.pdf [file supp_32.8.1506_MCB-MCB06271-11-s05.pdf]

## Supplementary methods- Quantitative RT-PCR

For gene expression measurement in U2OS cells, equal amount of total RNAs were used for reverse-transcription using the Transcriptor First Strand cDNA synthesis kit (Roche). The following TaqMan® probes from the universal probe library (Roche) were used: NQO1 (#87), GCLM (#18), HMOX1 (#25), TXN (#50), TXRD1 (#64), GSTP1 (#56), GCLC (#25), AKR1B10 (#25), AKR1C1 (#49) and GAPDH (#25). Quantitative real-time PCR (qRT-PCR) was performed on the Lightcycler® 480 system (Roche) as follows: one cycle of initial denaturation (95°C for 4 minutes), 45 cycles of amplification (95°C for 10 sec and 60°C for 30 sec), and a cooling period.

The following primers were synthesized by Integrated DNA Technologies:

NQO1: ATGTATGACAAAGGACCCTTCC and TCCCTTGCAGAGAGTACATGG  
HMOX1: AACTTTCAGAAGGGCCAGGT and CTGGGCTCTCCTTGTTGC  
GCLC: GGATGATGCTAATGAGTCTGACC and TCTACTCTCCATCCAATGTCTGAG  
GCLM: GACAAAACACAGTTGGAACAGC and CAGTCAAATCTGGTGGCATC  
GSTP1: TCCCTCATCTACACCAACTATGAG and GGTCTTGCCTCCCTGGTT  
TXN: TCAAATGCATGCCAACATTC and GGTGGCTTCAAGCTTTTCCT  
TXRD1: TTGGAATCCACCCTGTCTGT and CATCCACACTGGGGCTTAAC  
AKR1B10: AAAGCAACGTTCTTGGATGC and TGGAAGTGGCTGAAATTGG  
AKR1C1: CATGCCTGTCCTGGGATTT and AGAATCAATATGGCGGAAGC  
GAPDH: CTGACTTCAACAGCGACACC and TGCTGTAGCCAAATTCGTTGT

To measure gene expression in T98G cells, total RNAs were extracted and cDNAs were generated using the SureScript® III First Strand Synthesis System (Invitrogen). Real-time PCR was performed using Brilliant II SYBR® Green QPCR Master Mix (Agilent Technologies) on a MX3005P system (Stratagene) using the following parameters: 15 min initial denaturation and hotstart enzyme activation, 40 cycles of amplification (95°C for 10 sec and 60°C for 30 sec ) followed by melting curve measurement.

Primers were synthesized by Sigma. The sequences of the primers are as follows:

NQO1: GCAGACCTTGTGATATTCCAGT and GTCATACATGGCAGCGTAAGTG  
HMOX1: GCCAGCAACAAAGTGCAAGATTC and CACCAGAAAGCTGAGTGTAAGGAC  
GCLC: CTGGATGATGCTAATGAGTCTGA and TCTACTCTCCATCCAATGTCTGA  
GCLM: CTAGACAAAACACAGTTGGAACA and ATGCAGTCAAATCTGGTGGCAT  
TXN: AAGTCAAATGCATGCCAACATTC and AATGGTGGCTTCAAGCTTTTCCT  
AKR1B10: GAAAAGCAACGTTCTTGGATGCCT and ATCTGGAAGTGGCTGAAATTGGA  
AKR1C1: CTACAATGAGCAGCGCATCAGAC and GTCAAATATCGCACATTTCTGTTTTAG  
GAPDH: GTCTCCTCTGACTTCAACAGCGAC and CCAAATTCGTTGTCATACCAGGAA

Experiments were performed in triplicates at least twice. NQO1, GCLM and AKR1B10 were measured at least 3 times. Data presented are relative mRNA levels normalized to that of GAPDH, with the value in the control group set as 1. Error bars represent the standard deviations.
