# Supplementary material
Source: PubMed Central journal article supplement (PMC3318596)

Figure S4

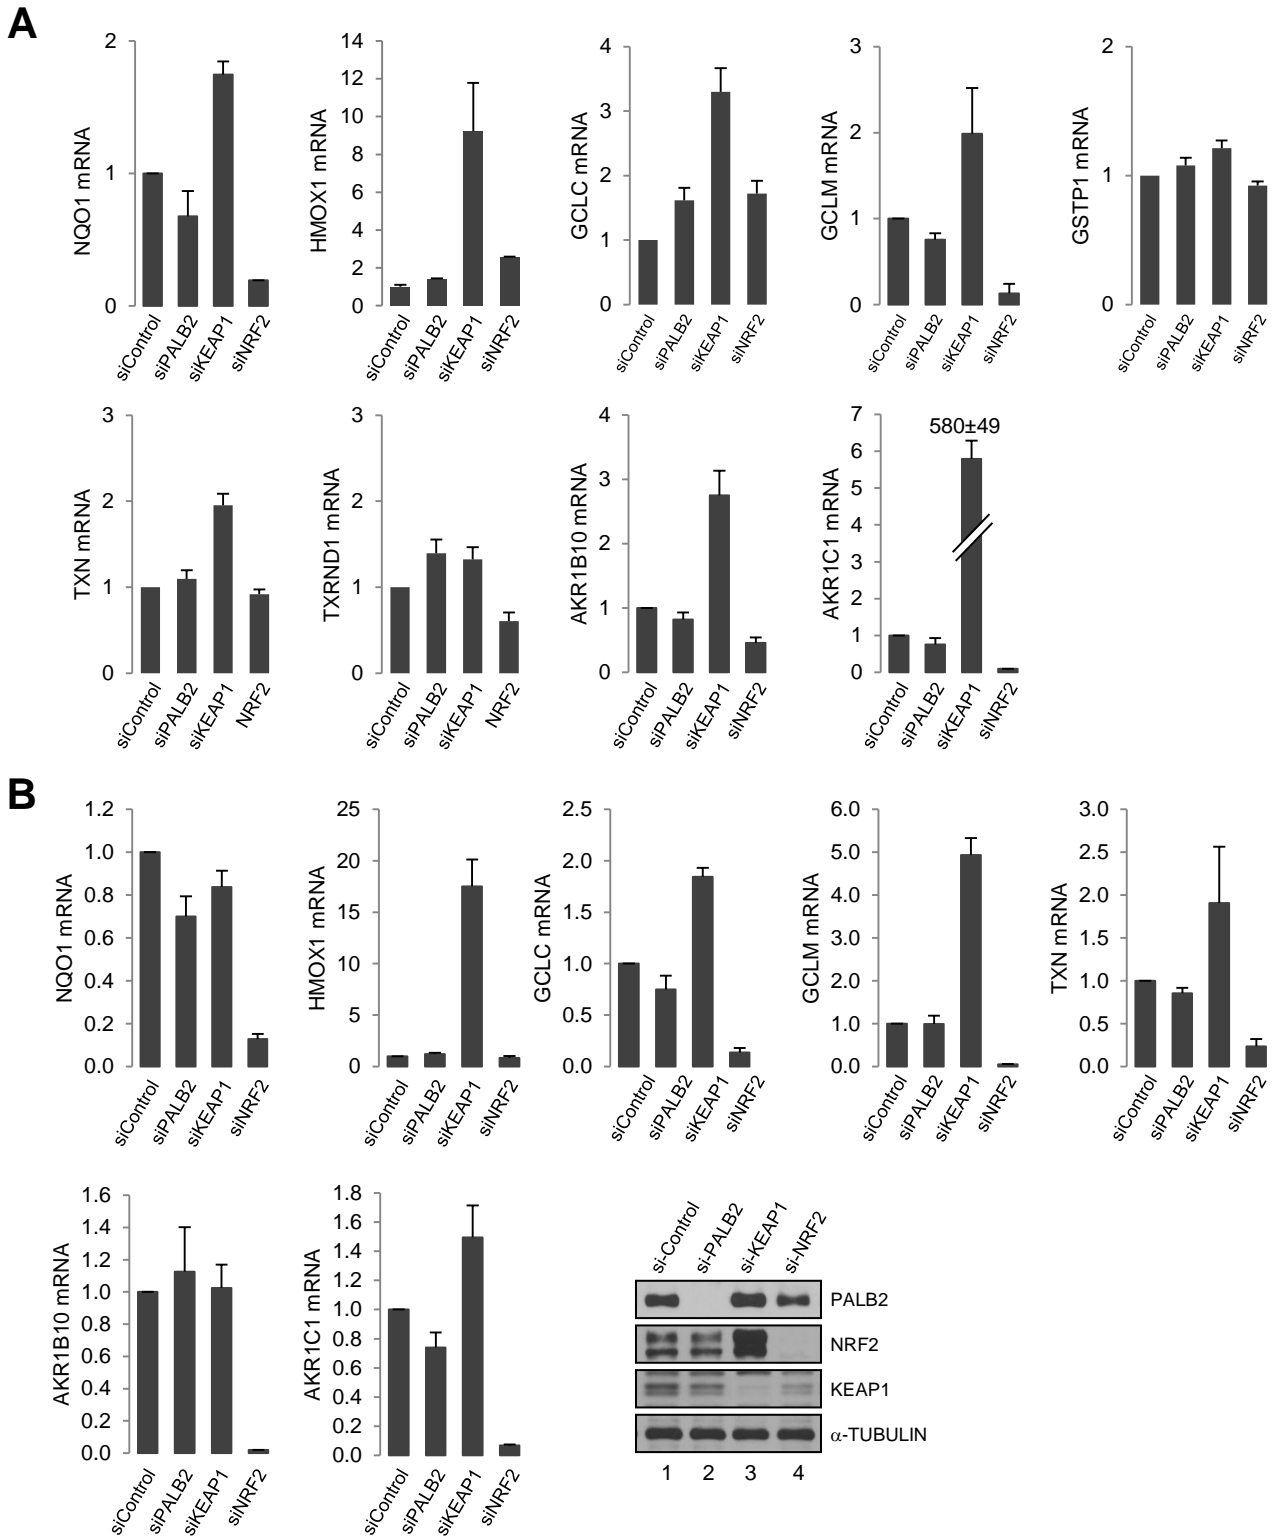

Supplement: supp_32.8.1506_MCB-MCB06271-11-s04.pdf [file supp_32.8.1506_MCB-MCB06271-11-s04.pdf]
